# Supplementary material
Source: PubMed Central journal article supplement (PMC2692097)
Supplement: NIHMS106266-supplement-Supp_Figure_6.pdf [file NIHMS106266-supplement-Supp_Figure_6.pdf]

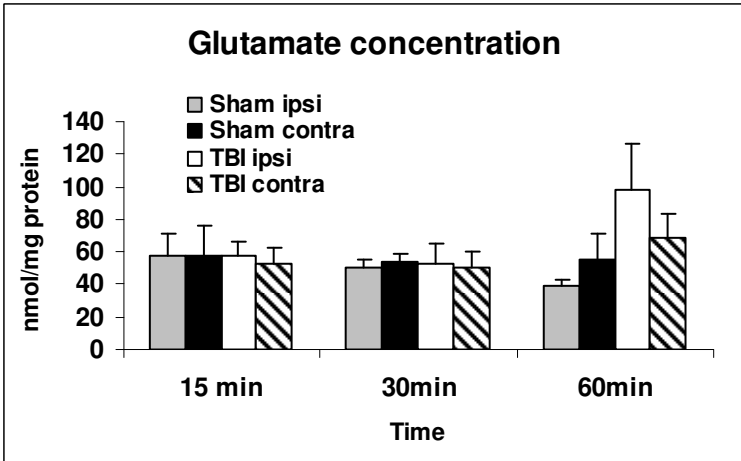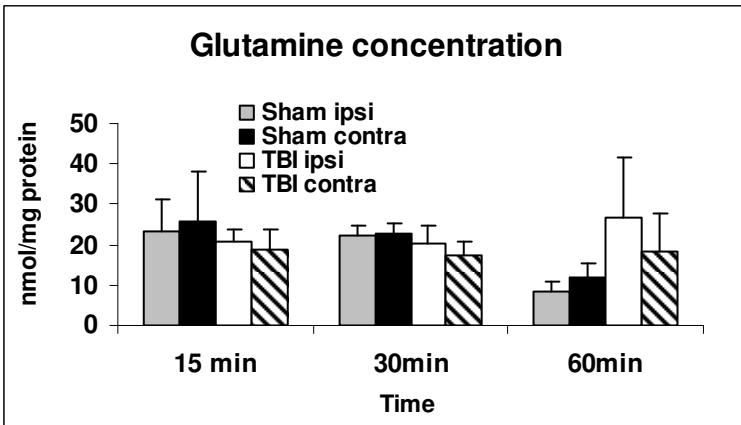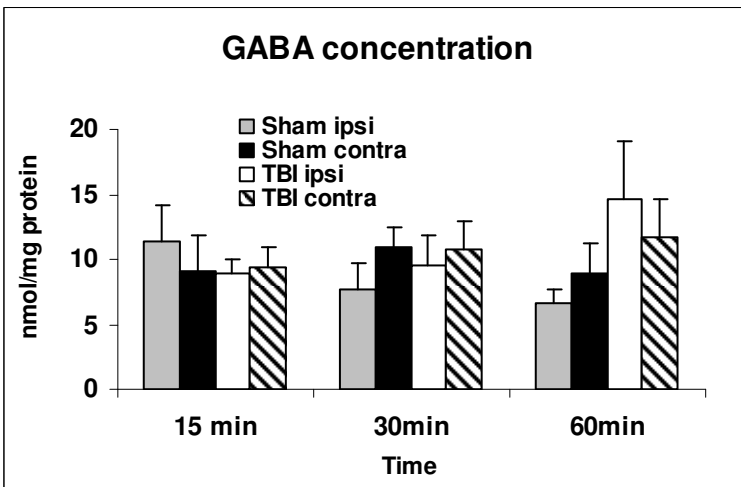

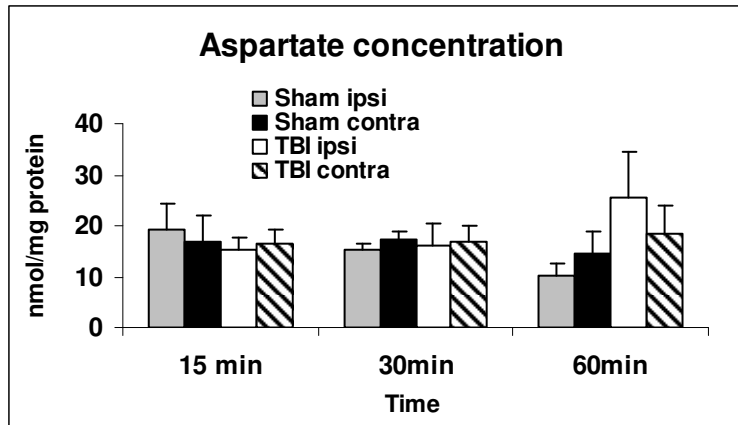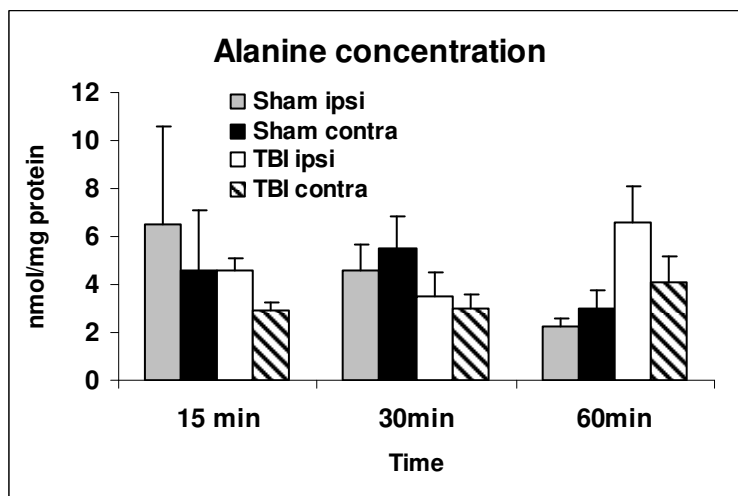

**Supplemental Figure 6. Amino acid concentrations in brains of 21-22 day old sham and TBI rats.**

The times 15, 30 and 60 min after i.p. injection of [1,6,-13C]glucose correspond to 5 hr 15 min, 5 hr 30 min and 6 hr after TBI.
