# Supplementary material
Source: PubMed Central journal article supplement (PMC2692097)
Supplement: NIHMS106266-supplement-Supp_Table_1.pdf [file NIHMS106266-supplement-Supp_Table_1.pdf]

### Supplemental Table 1. Metabolite cycling ratios<sup>#</sup>

| <b><u>15 min</u></b> | <b>GLU C3/GLU C4</b> | <b>GLN C3/GLN C4</b> | <b>GABA C3/GABA C2</b> |
|----------------------|----------------------|----------------------|------------------------|
| sham ipsi            | 1.13 ± 0.17          | 1.00 ± 0.13          | 0.66 ± 0.26            |
| sham contra          | 0.97 ± 0.11          | 1.02 ± 0.13          | 0.68 ± 0.16            |
| TBI ipsi             | 0.74 ± 0.11*         | 0.90 ± 0.16          | 0.58 ± 0.08            |
| TBI contra           | 0.67 ± 0.05          | 1.10 ± 0.28          | 0.57 ± 0.13            |
| <br>                 |                      |                      |                        |
| <b><u>30 min</u></b> |                      |                      |                        |
| sham ipsi            | 1.18 ± 0.15          | 1.11 ± 0.06          | 0.64 ± 0.09            |
| sham contra          | 0.81 ± 0.10          | 1.02 ± 0.13          | 0.65 ± 0.13            |
| TBI ipsi             | 1.00 ± 0.19          | 1.15 ± 0.21          | 0.49 ± 0.07            |
| TBI contra           | 1.08 ± 0.12          | 0.89 ± 0.12          | 0.84 ± 0.17            |

<sup>#</sup>Cycling ratios are the ratios of labeling from the second turn/first turn of the TCA cycle for glutamate glutamine and GABA. Values represent means ± S.E. of data from 6 TBI and 5 sham rats at each time points. Data were analyzed using one-way ANOVA. \* p <0.03 compared to sham ipsi.

### Supplemental Table 1.
